# Supplementary material for: Highly selective colorimetric sensing of Hg(ii) ions in aqueous medium and in the solid state via formation of a novel M–C bond
Source: Royal Society of Chemistry journal article supplement (doi:10.1039/c4dt03289f), 2015-01-01
Supplement: c4dt03289f1.pdf [file c4dt03289f1.pdf]

## Highly selective colorimetric sensing of Hg(II) ion in aqueous medium and solid state via formation novel M-C bond

C.Parthiban, R.Manivannan and Kuppanagounder P. Elango\*

### Table of Content

- Fig. S1.**  $^1\text{H}$  NMR spectrum of R1
- Fig. S2.**  $^{13}\text{C}$  NMR spectrum of R1
- Fig. S3.** LCMS spectrum of R1
- Fig. S4.** Colour change of receptor in aqueous solution (DMF:H<sub>2</sub>O; 1:9 v/v) in presence of various metal ions.
- Fig. S5.** UV-Vis spectral changes of the receptor upon the addition of the different cations.
- Fig. S6.** Fluorescence changes of R1 ( $6.5 \times 10^{-4}$  M) upon addition of Hg(II) ( $0-2.5 \times 10^{-3}$  M) in DMF: H<sub>2</sub>O (1:9 v/v).
- Fig. S7.** Benesi-Hildebrand plot of the receptor with Hg(II).
- Fig. S8.** Job's plot of R1( $2.5 \times 10^{-4}$  M) upon addition of Hg(II).
- Fig. S9.** Detection limits plot of the receptor.
- Table S1.** Crystal data and structure refinement for Hg(II) complex.
- Fig. S10.** Packing diagram of Hg(II) complex.
- Fig. S11.** Optimized geometry of the receptor R1.
- Fig. S12.** Mullikan Chagres of the receptor R1.
- Fig. S13.** Color changes of the test papers for detecting Hg(II) in aqueous solution with different concentrations.

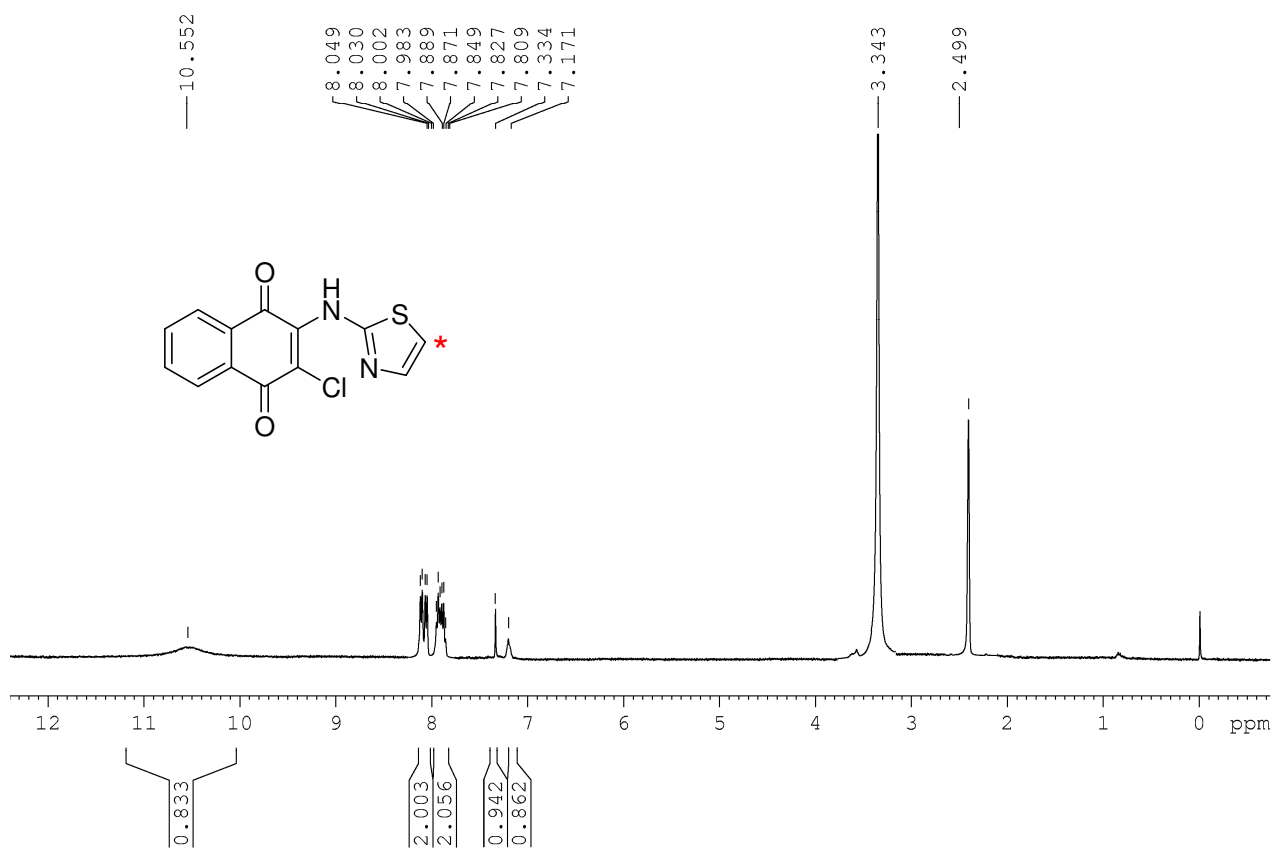

**Fig. S2.**  $^1\text{H}$  NMR spectrum of R1

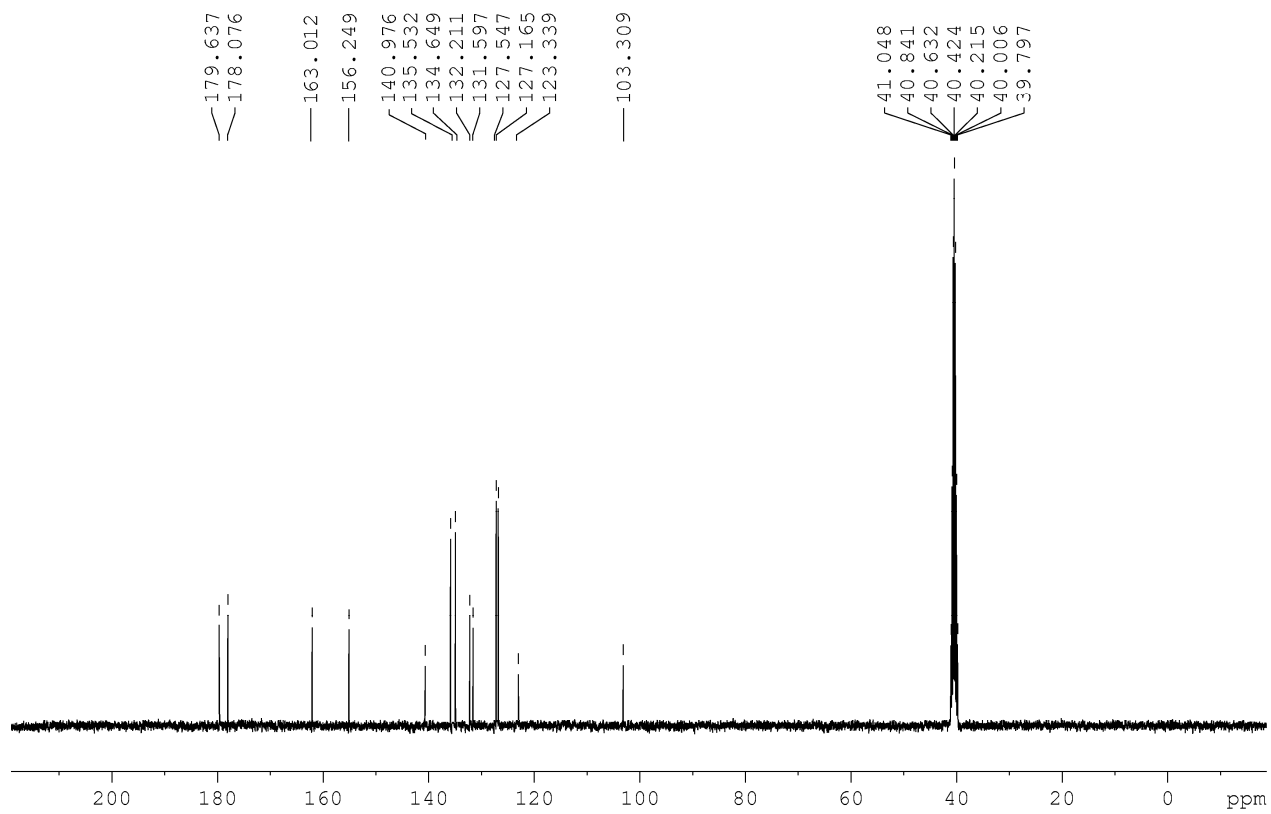

**Fig. S2.**  $^{13}\text{C}$  NMR spectrum of R1

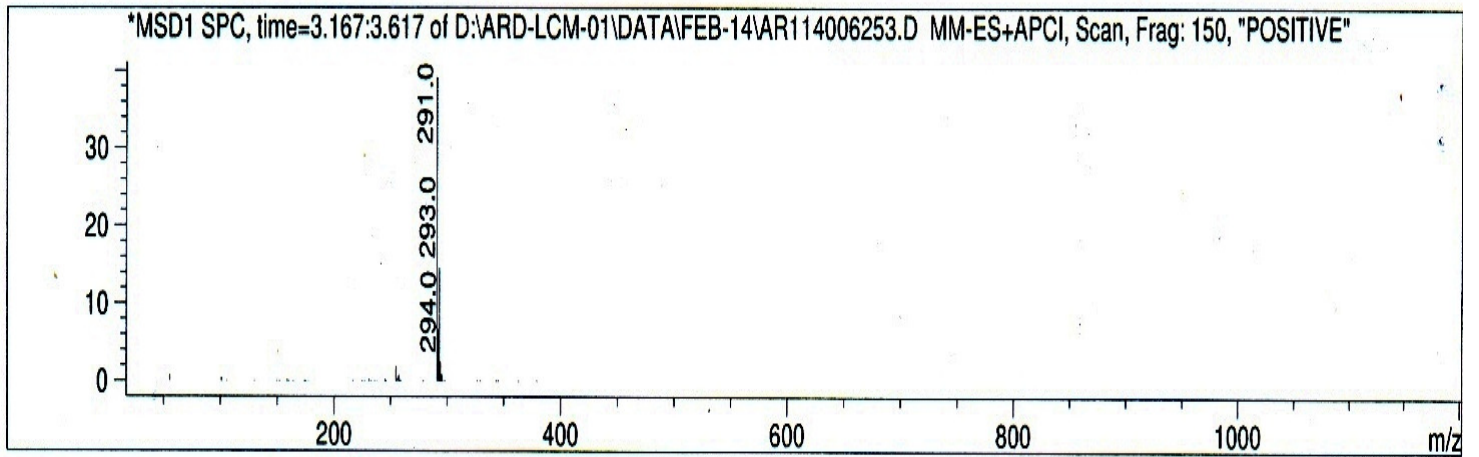

**Fig. S3.** LCMS spectrum of R1

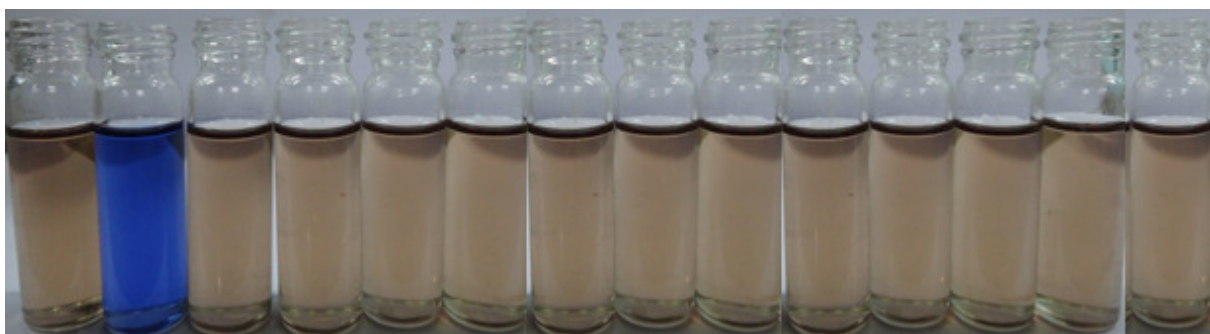

R Hg(II) Na(I) K(I) Mg(II) Ca(II) Ba(II) Pb(II) Fe(III) Co(II) Ni(II) Cu(II) Zn(II) Cd(II)

**Fig. S4.** Colour change of receptor in aqueous solution (DMF:H<sub>2</sub>O; 1:9 v/v) in presence of various metal ions.

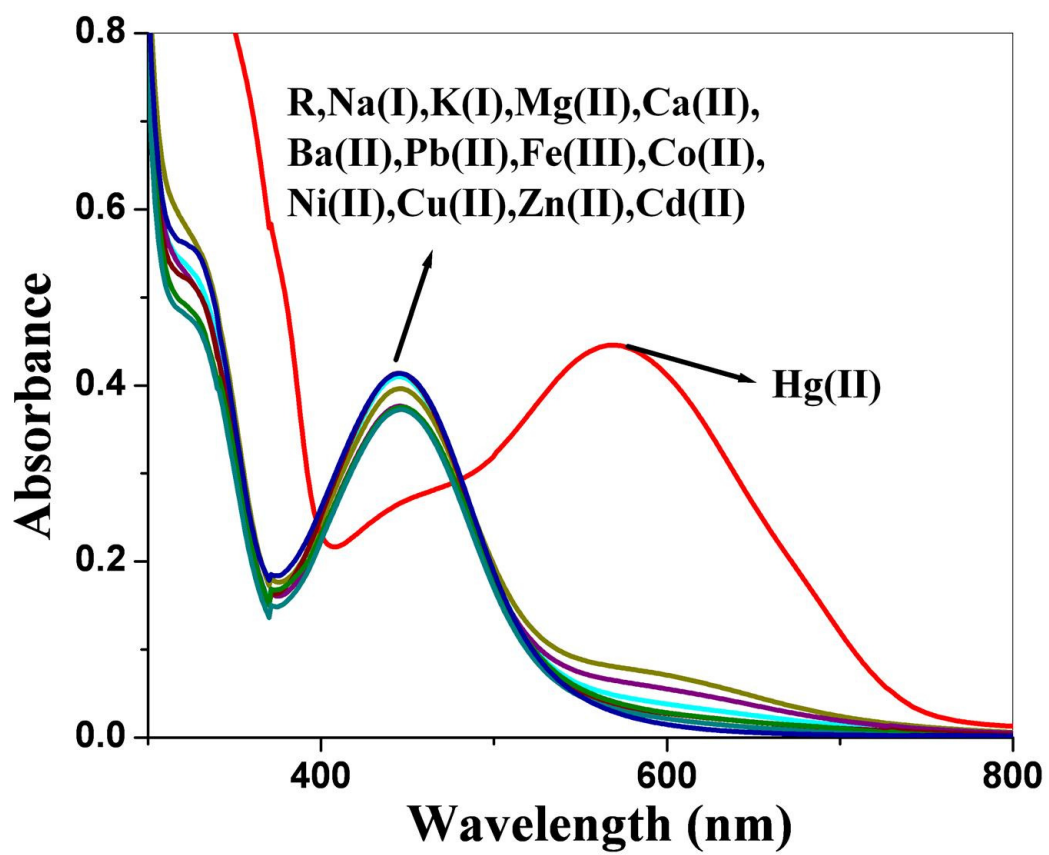

**Fig. S5.** UV-Vis spectral changes of the receptor upon the addition of the different cations.

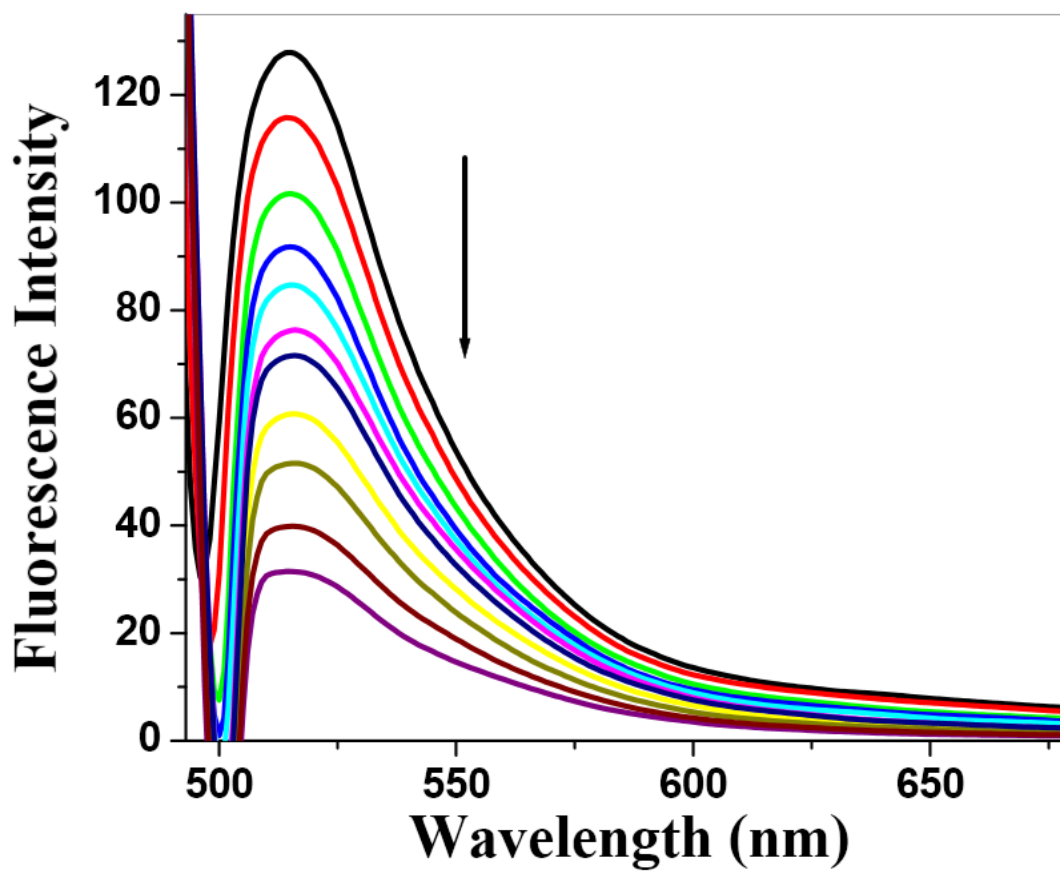

**Fig. S6.** Fluorescence changes of R1( $6.5 \times 10^{-4}$  M) upon addition of Hg(II) (0- $2.5 \times 10^{-3}$  M) in DMF: H<sub>2</sub>O (1:9 v/v).

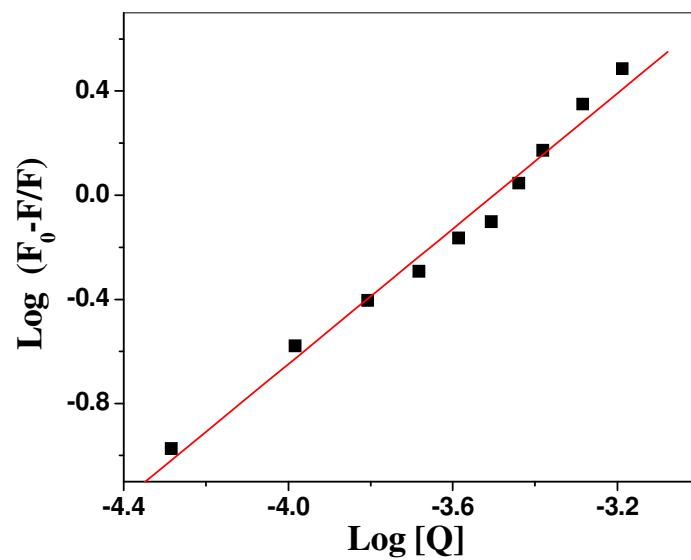

**Fig. S7.** Benesi-Hildebrand plot of the R1 with Hg(II).



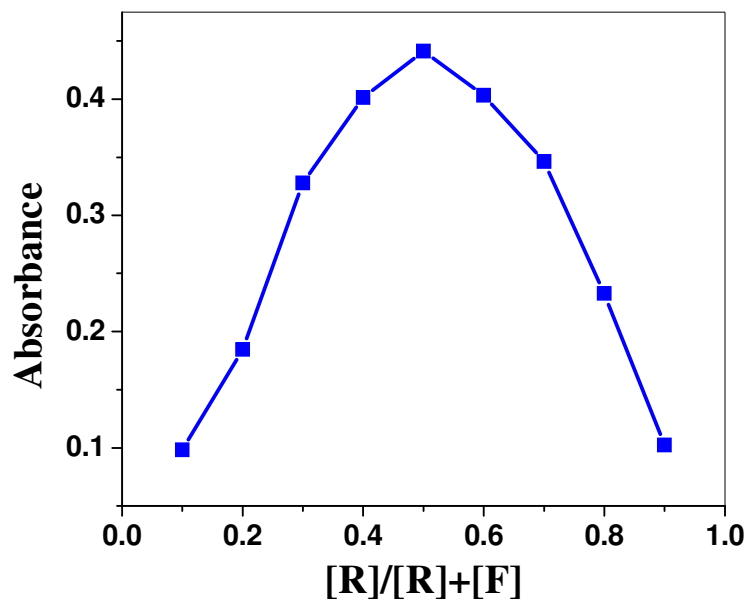

**Fig. S8.** Job's plot of R1 ( $2.5 \times 10^{-4}$  M) upon addition of Hg(II).

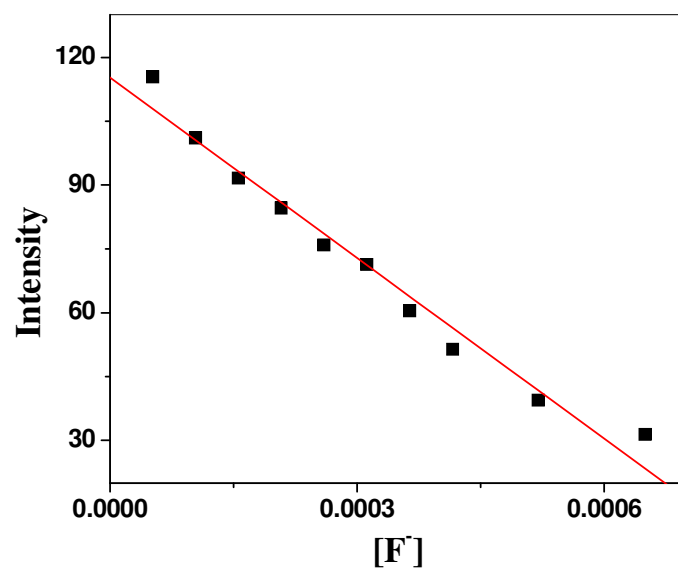

**Fig. S9.** Detection limits plot of the receptor.

---

**Table S1.** Crystal data and structure refinement for the Hg(II) complex.

---

|                                   |                                                                                                                          |
|-----------------------------------|--------------------------------------------------------------------------------------------------------------------------|
| Empirical formula                 | C <sub>16</sub> H <sub>13</sub> Cl <sub>2</sub> HgN <sub>3</sub> O <sub>3</sub> S                                        |
| Formula weight                    | 598.84                                                                                                                   |
| Temperature                       | 293(2) K                                                                                                                 |
| Wavelength                        | 0.71073 Å                                                                                                                |
| Crystal system, space group       | Monoclinic, P21/c                                                                                                        |
| Unit cell dimensions              | a = 12.9121(5) Å    alpha = 90 deg.<br>b = 7.7803(3) Å    beta = 94.4640(10) deg.<br>c = 18.6223(8) Å    gamma = 90 deg. |
| Volume                            | 1865.12(13) Å <sup>3</sup>                                                                                               |
| Z, Calculated density             | 4, 2.133 Mg/m <sup>3</sup>                                                                                               |
| Absorption coefficient            | 8.672 mm <sup>-1</sup>                                                                                                   |
| Crystal size                      | 0.35 x 0.30 x 0.25 mm                                                                                                    |
| Theta range for data collection   | 2.19 to 26.00 deg.                                                                                                       |
| Limiting indices                  | -15<=h<=15, -9<=k<=9, -22<=l<=22                                                                                         |
| Reflections collected / unique    | 26561 / 3661 [R(int) = 0.0471]                                                                                           |
| Completeness to theta = 26.00     | 100.0 %                                                                                                                  |
| Absorption correction             | Semi-empirical from equivalents                                                                                          |
| Max. and min. transmission        | 0.2294 and 0.1503                                                                                                        |
| Refinement method                 | Full-matrix least-squares on F <sup>2</sup>                                                                              |
| Data / restraints / parameters    | 3661 / 1 / 239                                                                                                           |
| Goodness-of-fit on F <sup>2</sup> | 1.187                                                                                                                    |
| Final R indices [I>2sigma(I)]     | R1 = 0.0336, wR2 = 0.0899                                                                                                |
| R indices (all data)              | R1 = 0.0500, wR2 = 0.0970                                                                                                |
| Largest diff. peak and hole       | 0.765 and -0.942 e.Å <sup>-3</sup>                                                                                       |

---

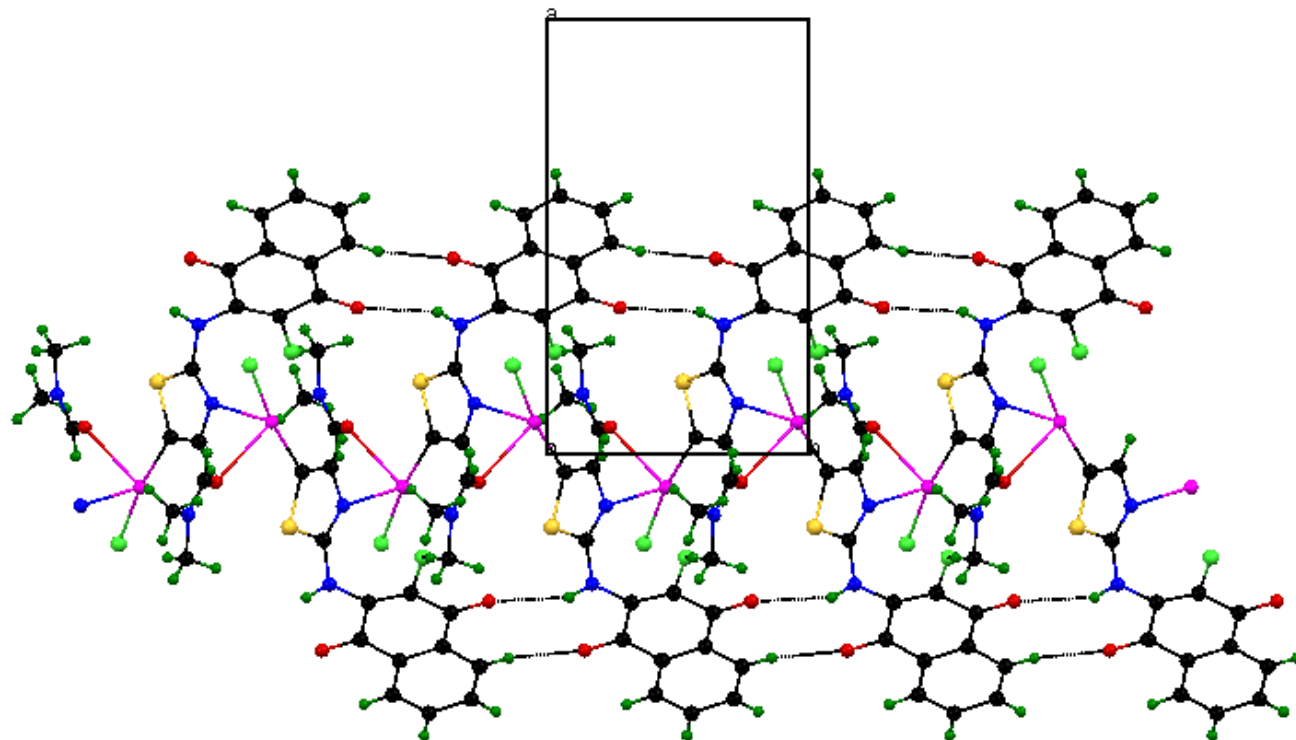

**Fig. S10.** Packing diagram of the Hg(II) complex.

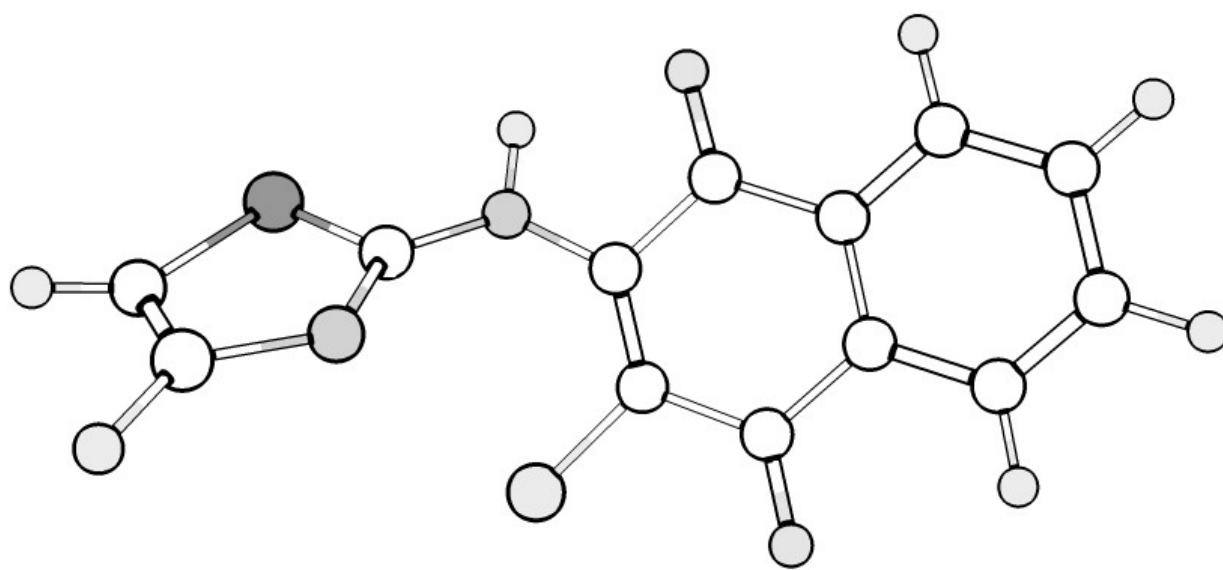

**Fig. S11.** Optimized geometry of the receptor R1.

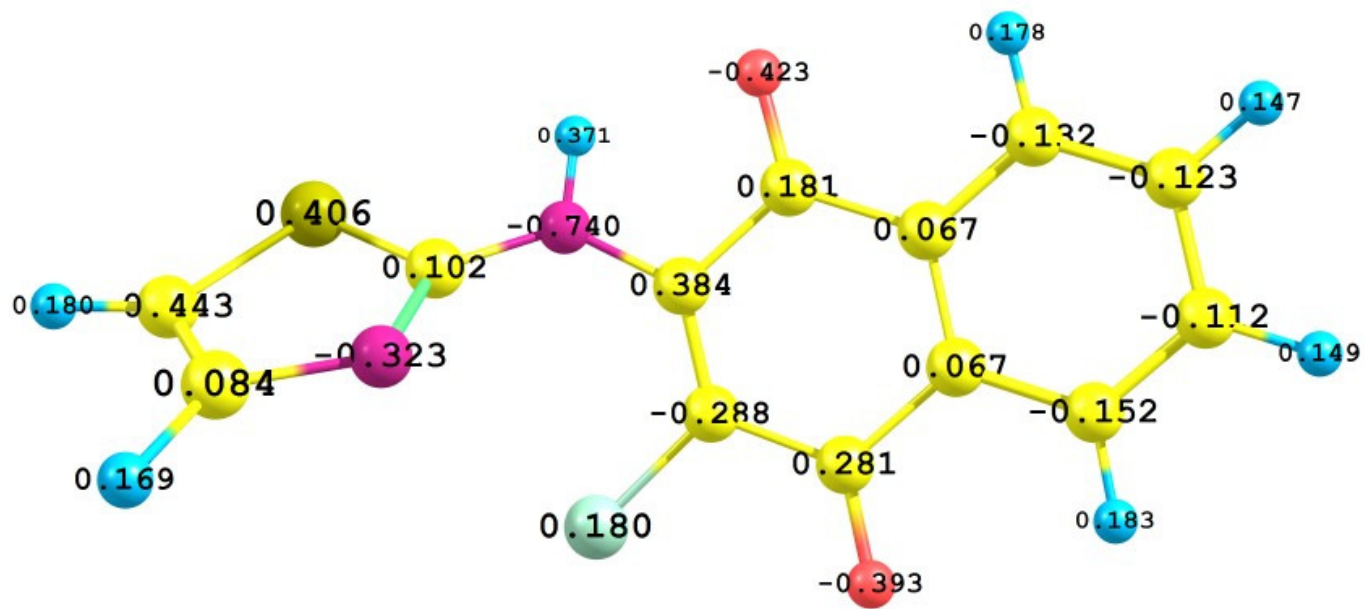

**Fig. S12.** Mulliken Charges of the receptor R1.

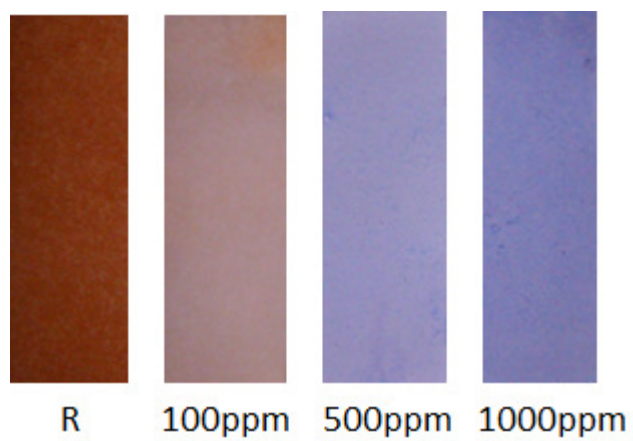

**Fig. S13.** Color changes of the test papers for detecting Hg(II) in aqueous solution with different concentrations.
